# Supplementary material for: Crystallographic and Physicochemical Analysis of Bovine and Human Teeth Using X-ray Diffraction and Solid-State Nuclear Magnetic Resonance
Source: MDPI journal article supplement (doi:10.3390/jfb13040254), 2022-11-19
Supplement: s1 [file s1]

**Table S1.** The hexagonal symmetry-P63/m space group. Retrieved from Journal of Applied Crystallography, 43,320-327,2010.

| <b>a</b>    | <b>b</b>    | <b>c</b>   | <b><math>\alpha</math></b> | <b><math>\beta</math></b> | <b><math>\gamma</math></b> |          |
|-------------|-------------|------------|----------------------------|---------------------------|----------------------------|----------|
| 9.421       | 9.421       | 6.88       | 90                         | 90                        | 120                        |          |
| <b>Atom</b> | <b>Site</b> | <b>Occ</b> | <b>x</b>                   | <b>y</b>                  | <b>z</b>                   | <b>U</b> |
| Ca          | 4f          | 0.33333    | 0.33333                    | 0.6667                    | 0.00092                    | 0.019    |
| Ca          | 6h          | 1          | 0.24525                    | 0.99333                   | 0.25                       | 0.019    |
| P           | 6h          | 1          | 0.39811                    | 0.36952                   | 0.25                       | 0.019    |
| O           | 6h          | 1          | 0.32711                    | 0.48474                   | 0.25                       | 0.019    |
| O           | 6h          | 1          | 0.58616                    | 0.465                     | 0.25                       | 0.019    |
| O           | 12i         | 1          | 0.43152                    | 0.25583                   | 0.07261                    | 0.019    |
| O           | 4e          | 0.5        | 0                          | 0                         | 0.18819                    | 0.019    |
